# Supplementary material for: Co-designing a Mobile Gamified Attention Bias Modification Intervention for Substance Use Disorders: Participatory Research Study
Source: PubMed Central journal article supplement (PMC6797967; doi:10.2196/15871), 2019-10-03
Supplement: mhealth_v7i9e15871_app1.pdf [file mhealth_v7i9e15871_app1.pdf]

## Appendix 1: Demographic Characteristics of Patient Participants

| Demographic Characteristics                                                             | Outpatients | Inpatients |
|-----------------------------------------------------------------------------------------|-------------|------------|
| Nationality                                                                             |             |            |
| 1. Singaporean                                                                          | 5 (100%)    | 5 (100%)   |
| 2. Singapore PR / Others                                                                | 0           | 0          |
| Gender                                                                                  |             |            |
| 1. Male                                                                                 | 3           | 5 (100%)   |
| 2. Female                                                                               | 2           | 0          |
| Marital Status                                                                          |             |            |
| 1. Single                                                                               | 5 (100%)    | 2          |
| 2. Married                                                                              | 0           | 2          |
| 3. Divorced                                                                             | 0           | 1          |
| 4. Widowed / Others                                                                     | 0           | 0          |
| Race:                                                                                   |             |            |
| 1. Chinese                                                                              | 4           | 2          |
| 2. Malay                                                                                | 0           | 0          |
| 3. Indian                                                                               | 1           | 3          |
| Highest level of education                                                              |             |            |
| 1. Primary Education and below                                                          | 0           | 1          |
| 2. Secondary education                                                                  | 4           | 2          |
| 3. Junior College/Polytechnic/Technical studies/ Undergraduate and Postgraduate Studies | 1           | 2          |
| Employment Status                                                                       |             |            |
| 1. Unemployed                                                                           | 4           | 2          |
| 2. Part time                                                                            | 0           | 3          |
| 3. Full time                                                                            | 1           | 0          |
| Housing Conditions                                                                      |             |            |
| 1. Homeless                                                                             | 0           | 1          |
| 2. Halfway house                                                                        | 0           | 0          |
| 3. 1 Room Rental Flat                                                                   | 3           | 0          |
| 4. 2 & 3 Room Flat                                                                      | 1           | 1          |
| 5. 4 & 5 Room Flat                                                                      | 1           | 3          |
| 6. Private Condo                                                                        | 0           | 0          |
| 7. Landed Property                                                                      | 1           | 0          |
| *Substance Use:                                                                         |             |            |
| 1. Heroin                                                                               | 2           | 2          |
| 2. Other Opioids                                                                        | 1           | 2          |
| 3. Cannabis                                                                             | 2           | 3          |
| 4. Amphetamine                                                                          | 4           | 4          |
| 5. Cocaine                                                                              | 0           | 0          |
| 6. Alcohol                                                                              | 2           | 1          |
| Days on treatment Facility (Average)                                                    | NA          | 4.7 days   |
| Total abstinence period (Average)                                                       | 14 months   | NA         |

**\*Some participants have declared that they have used multiple drugs**
